# Supplementary material for: Relationship between hemoglobin glycation index and extent of coronary heart disease in individuals with type 2 diabetes mellitus: a cross-sectional study
Source: PeerJ. 2017 Oct 5;5:e3875. doi: 10.7717/peerj.3875 (PMC5632534; doi:10.7717/peerj.3875)
Supplement: Data S1 — HbA1c, glycated hemoglobin A1c; HDL-C, high-density lipoprotein cholesterol; LDL-C, low-density lipoprotein cholesterol; TG, triglycerides; FPG, fasting plasma glucose; SBP, systolic blood pressure; DBP, diastolic blood pressure; LAD, left anterior descending artery. [file peerj-05-3875-s001.xlsx]

## Sheet: 工作表1
Patient number	Age	Gender	Triglycerides (mg/dL)	High Density Lipoprotein-Cholesterol (mg/dL)	Low Density Lipoprotein-Cholesterol (mg/dL)	Glycated hemoglobin A1c (%)	Fasting plasma glucose (mg/dL)	Proteinuria (mg/24 hours)	Number of vessels involved	Left anterior descending artery disease	Length of stay (days)	Number of stent deployed	Systolic blood pressure (mm Hg)	Diastolic blood pressure (mm Hg)	Cigarette smoking	Serum creatinine (mg/dL)
1	82	M	135	36	107	8.2	267	100	3	yes	3	2	130	81	No	3.2
2	78	M	127	36	111	7.1	165	100	2	yes	4	0	118	78	No	4.84
3	68	M	91	30	80	6.5	122	39	3	yes	2	2	112	67	No	1.15
4	66	M	156	33	66	9.9	292	304	3	yes	2	2	112	72	No	1.81
5	75	F	339	30	90	6.9	85	0	3	yes	2	0	139	77	No	0.93
6	52	M	228	32	96	7.5	179	4.22	2	yes	2	1	118	70	No	0.9
7	72	M	90	36	99	5.3	110	10	1	No	2	0	134	72	No	1.63
8	60	M	93	33	56	6.6	129	15	0	No	1	0	142	93	No	0.92
9	79	F	77	47	58	6.5	126	0	1	yes	2	1	130	80	No	0.72
10	74	M	54	33	68	7.3	151	0	1	No	2	1	143	73	No	0.92
11	73	F	108	44	103	7.2	265	100	0	No	2	0	182	63	No	2.28
12	74	F	38	57	64	6.8	145	9.88	0	No	1	0	130	65	No	0.7
13	80	F	76	73	112	7.3	211	5.39	0	No	2	0	130	80	No	0.94
14	73	F	61	42	74	6.7	129	6.36	1	No	2	0	135	73	No	0.65
15	72	M	251	36	83	6.6	110	4.37	0	No	2	0	115	68	No	1.59
16	52	M	91	37	91	5.9	153	0	0	No	2	0	128	74	No	1.01
17	45	M	490	30	67	7.4	115	54.17	3	yes	2	2	117	81	No	0.76
18	67	F	739	60	55	12.6	209	71.29	2	No	4	0	135	74	No	1.98
19	64	M	217	32	44	7.1	358	300	3	yes	3	1	127	63	No	10.02
20	62	M	176	38	84	6.3	114	1.76	0	No	5	0	131	84	No	1.49
21	45	M	171	39	79	6.4	153	0	0	No	1	0	121	74	No	1.11
22	75	F	184	47	267	13	186	0	2	Yes	5	1	145	72	No	0.48
23	82	M	135	36	107	8.2	172	100	3	Yes	4	1	136	74	No	3.2
24	39	M	221	43	166	8.1	213	4364	1	No	2	0	162	102	Yes	1.8
25	68	M	145	26	48	7.3	130	2492	3	Yes	2	0	154	80	Yes	1.89
26	62	M	53	52	102	7.1	95	645	0	No	2	0	159	90	No	1.28
27	49	M	241	38	118	6	111	0	0	No	2	0	160	102	No	1.12
28	62	F	72	48	109	6.6	126	9.76	0	No	2	0	138	83	No	0.59
29	64	F	114	34	69	7.2	199	14.09	0	No	2	0	147	69	No	0.49
30	38	M	254	28	118	6.8	202	6.77	2	No	3	1	120	80	No	0.97
31	63	M	177	24	128	7.6	127	37.04	3	Yes	3	1	100	59	No	1.7
32	75	M	404	32	84	8.2	164	0	3	Yes	7	3	162	62	Yes	9.19
33	65	F	171	37	98	7.5	183	30	2	Yes	3	0	174	95	no	0.78
34	64	M	114	39	66	6.8	107	4.26	0	No	1	0	151	72	Yes	1.53
35	72	M	137	38	66	7.5	124	37.88	1	Yes	2	1	138	65	No	1.88
36	73	M	284	28	70	6.8	113	11.71	2	No	2	1	114	76	No	1.16
37	59	F	87	32	63	6.8	114	9.7	0	No	2	0	131	83	No	0.61
38	65	M	140	41	116	8.3	297	0	2	Yes	2	0	132	68	No	0.78
39	55	F	199	41	54	6.1	122	0	0	No	2	0	142	86	No	0.66
40	85	F	152	35	90	6.4	191	104	0	No	2	0	170	62	No	1.53
41	60	F	78	27	78	7.4	89	371	1	Yes	2	0	173	102	No	1.89
42	73	F	478	36	132	7.6	120	0	2	Yes	5	2	171	80	No	0.8
43	62	M	80	34	59	7.8	85	7.5	3	Yes	5	3	158	84	No	0.98
44	82	F	110	18	66	8.5	158	13.13	3	Yes	2	3	147	63	No	0.9
45	54	M	154	28	80	9	208	100	3	Yes	4	2	145	88	No	2.13
46	73	F	168	39	62	6.3	112	0	0	No	2	0	130	90	No	1.17
47	56	F	116	36	52	11.6	177	0	3	Yes	1	2	182	88	No	7.59
48	69	M	66	36	71	8.7	309	0	1	No	2	1	106	57	Yes	1.11
49	42	M	131	53	102	6.6	130	0	0	No	2	0	120	60	No	0.98
50	75	F	80	52	94	9.3	212	47	3	Yes	14	3	84	60	No	1.59
51	69	M	134	46	66	7	142	8.04	3	Yes	3	4	124	65	no	1.01
52	68	M	87	34	61	7.9	114	20.23	3	Yes	2	1	130	81	no	1.01
53	74	M	294	34	83	7.3	172	2469	3	Yes	5	3	163	74	no	1.86
54	64	M	94	44	82	10	164	240	3	Yes	5	1	142	78	yes	1.12
55	65	M	91	34	101	7.6	156	127	1	Yes	2	1	147	69	yes	0.8
56	56	M	179	34	154	7.6	212	3.29	3	Yes	3	1	168	106	yes	0.89
57	65	F	275	34	118	7.9	188	0	3	Yes	2	0	160	77	no	8.77
58	77	F	61	65	133	6.6	184	0	3	Yes	4	1	113	63	no	1.07
59	59	M	207	41	164	8.3	100	489	3	Yes	4	0	130	80	no	0.88
60	85	F	142	45	67	7.2	255	0	1	Yes	2	0	140	90	yes	2
61	54	M	108	38	72	7.8	135	23.3	3	Yes	2	0	134	65	no	0.78
62	47	F	193	44	156	9.2	134	1253	3	Yes	4	1	121	76	no	1.15
63	54	M	108	38	72	7.8	135	23.3	3	Yes	2	0	134	65	no	0.78
64	55	M	356	47	103	7.2	92	0	2	Yes	5	1	125	76	yes	0.79
65	55	M	150	43	54	6.4	89	0	0	no	2	0	134	76	no	0.72
66	76	M	47	56	91	7.8	166	100	3	Yes	1	2	145	82	no	1.08
67	76	F	165	24	54	6.8	152	0	2	no	3	2	123	67	no	1.2
68	68	M	86	39	74	6.9	187	4.78	0	no	4	0	159	81	no	0.92
69	73	M	58	41	107	6.3	95	100	3	Yes	4	2	133	61	no	1.14
70	58	M	42	47	28	7.6	130	100	1	Yes	10	1	83	55	yes	1.5
71	73	M	137	37	69	8.8	111	13.14	3	Yes	28	2	136	73	yes	1.56
72	80	F	166	48	92	6.3	93	0	1	Yes	10	1	123	63	no	1.97
73	76	F	165	24	54	6.8	152	47.2	2	no	3	0	123	67	no	1.2
74	68	M	86	39	74	6.9	187	4.78	0	no	4	0	159	81	no	0.92
75	73	M	135	191	137	6.9	116	300	3	Yes	4	2	133	61	no	1.07
76	58	M	42	47	28	7.6	130	100	1	Yes	10	1	83	55	yes	1.25
77	75	M	88	35	80	7.8	195	0	3	Yes	2	0	141	87	yes	1.3
78	70	M	91	30	76	6.9	178	0	1	no	2	0	130	80	no	0.95
79	73	M	309	27	112	6.6	106	43	3	Yes	5	3	150	75	no	1.01
80	77	M	67	32	69	6.3	100	3.48	0	no	2	0	134	55	no	0.79
81	55	F	79	40	65	7.4	49	3.92	0	no	1	0	141	79	no	0.76
82	64	F	342	84	99	8.7	232	13.15	3	Yes	1	2	153	74	yes	0.67
83	60	M	42	52	62	6.2	114	3.31	0	no	2	0	151	87	no	1.12
84	82	F	152	42	187	6	119	1523	1	Yes	7	1	143	83	no	3.17
85	84	M	39	51	73	6.7	66	0	3	Yes	5	0	139	60	no	1.08
86	77	M	93	37	57	7.1	107	10	3	Yes	2	2	150	79	no	1.53
87	60	F	239	50	81	9.2	290	431	2	Yes	2	1	132	86	no	0.89
88	57	M	152	28	94	8.2	184	0	3	Yes	2	0	178	104	no	0.86
89	75	F	90	68	79	11	72	0	3	Yes	2	2	123	83	no	1.42
90	70	M	119	71	149	8.4	161	8530	3	yes	10	2	228	121	yes	7.1
91	63	M	210	28	125	7.1	146	0	3	yes	2	3	144	86	yes	0.83
92	66	F	284	34	66	6.4	130	9.53	1	yes	2	0	169	82	no	0.56
93	65	M	81	32	86	7.7	137	9.17	3	yes	3	3	145	72	no	1.43
94	68	M	33	39	37	8	96	500	3	yes	3	1	177	86	no	5.89
95	66	M	39	41	82	8	175	5.29	0	no	1	0	136	68	no	0.81
96	76	F	79	43	86	8.4	70	43	3	yes	2	0	97	76	no	0.76
97	43	M	203	26	98	6.1	111	0	3	yes	14	1	165	98	no	11.5
98	69	M	104	30	59	7.1	192	40	2	yes	4	1	150	90	no	1.91
99	63	F	162	34	86	9.7	178	100	3	yes	2	0	143	70	no	1.1
100	85	F	279	29	98	7.5	185	30	0	no	2	0	117	83	no	1.78
101	60	F	139	34	60	8.5	139	23	2	yes	2	0	114	68	no	1.15
102	83	M	68	38	73	7	117	7.92	2	yes	3	0	134	55	no	1.03
103	80	M	123	72	133	6.9	106	5.12	3	yes	3	1	130	80	yes	0.78
104	67	F	51	67	30	6.5	106	0	3	yes	3	0	120	80	no	0.62
105	74	F	56	41	96	6.8	129	0	0	no	1	0	135	84	no	0.59
106	79	F	130	53	117	9.2	149	14.9	1	yes	1	0	129	74	no	0.83
107	54	F	160	29	78	9	202	4.83	0	no	4	0	109	68	no	0.66
108	60	F	139	34	60	8.5	139	23	2	no	2	0	114	68	no	1.15
109	65	F	59	44	91	8.1	171	0	1	yes	2	0	140	80	no	0.67
110	82	F	432	38	88	9.9	301	21.8	1	yes	6	2	165	80	no	1.04
111	78	F	53	41	66	7.1	193	8.11	1	no	1	0	150	73	no	0.87
112	70	F	99	45	81	6.4	157	21.7	2	yes	2	0	147	85	no	0.87
113	59	F	161	55	110	6.9	142	12.2	0	no	1	0	120	71	no	1.19
114	73	F	73	24	47	6.5	99	100	3	yes	7	2	105	57	no	4.84
115	55	M	131	36	118	8	109	58	3	yes	2	0	130	80	yes	1.24
116	65	M	466	39	172	7.1	147	0	1	yes	2	1	136	70	no	2.9
117	76	F	265	25	55	7.1	148	0	0	no	2	0	164	84	no	0.86
118	77	M	378	26	138	6.2	98	0	3	yes	2	2	164	62	yes	1.31
119	80	F	56	29	53	6.7	111	0	2	yes	2	2	120	60	no	0.7
120	68	F	109	45	92	7.7	179	33.8	3	yes	2	3	155	79	no	0.9
121	61	F	96	33	49	7	169	0	3	no	2	1	115	53	no	0.78
122	59	F	229	38	84	9	269	0	0	no	2	0	143	86	no	0.79
123	55	M	115	28	73	9.6	219	0	3	yes	4	5	103	73	yes	0.78
124	65	F	49	56	97	6.6	145	0	1	yes	2	0	78	52	no	0.67
125	80	F	75	49	61	6.6	154	64	2	yes	17	1	104	53	no	1.51
126	50	M	61	52	96	6.1	117	0	3	yes	3	0	73	48	yes	7.52
127	65	F	253	40	101	8.7	102	6	2	yes	2	0	142	77	no	0.52
128	79	F	203	39	82	6.2	97	0	1	yes	2	1	134	82	no	0.9
129	58	M	93	40	113	6.4	159	0	1	no	2	2	145	92	yes	0.91
130	58	M	105	45	124	8.9	228	30	3	yes	4	0	120	80	yes	0.87
131	63	M	249	33	125	8.7	72	0	3	yes	4	3	114	64	yes	0.75
132	63	F	159	37	87	7.8	103	0	1	no	6	1	150	63	no	6.81
133	67	M	83	21	81	7.7	165	301	1	no	5	1	130	80	no	0.91
134	44	M	124	44	138	6.5	157	0	1	no	2	2	137	82	no	0.99
135	61	M	97	56	61	8.7	170	0	2	yes	2	0	96	63	no	1.04
136	60	M	153	38	77	8.5	248	5.32	3	no	3	2	148	79	yes	0.56
137	71	M	94	32	145	7.6	103	100	3	yes	12	4	105	64	no	1.31
138	59	M	182	35	64	7	135	0	2	yes	2	2	120	80	yes	0.85
139	69	M	111	29	107	7.2	141	0	2	yes	2	0	191	86	yes	0.73
140	83	M	80	31	102	7.6	131	0	3	yes	3	2	132	96	no	1.29
141	62	M	69	49	57	7.6	131	0	3	yes	3	0	142	78	no	0.85
142	68	M	295	35	62	6.3	118	5.26	3	yes	4	3	110	70	yes	0.88
143	66	M	197	29	72	6.1	111	0	1	no	1	0	115	66	yes	1.1
144	74	F	93	48	71	6.1	93	0	2	yes	2	0	130	80	no	2.21
145	79	F	90	57	117	6.3	127	0	0	no	2	0	145	70	no	1.05
146	65	M	93	28	63	6.7	110	0	3	yes	2	2	168	69	no	7.16
147	57	M	92	33	77	8	96	100	2	yes	2	0	134	86	no	2.88
148	67	F	140	78	158	7.4	126	6.5	3	yes	2	2	120	80	no	0.77
149	75	M	571	35	155	7.6	122	0	3	yes	4	1	123	69	yes	1.54
150	62	F	392	43	123	9.2	307	300	3	yes	3	1	148	68	no	7.03
151	77	F	519	31	64	6.5	212	0	0	no	2	0	137	64	no	0.85
152	45	M	453	46	136	6.3	106	0	0	no	1	0	105	70	no	1.1
153	85	F	141	29	52	6.8	143	0	3	yes	10	2	101	54	no	1.09
154	78	F	97	54	91	6.7	127	123	3	no	2	1	150	90	no	0.96
155	57	F	237	35	93	6.3	90	500	2	yes	8	2	177	102	no	7.02
156	55	F	356	28	73	6.3	89	0	1	no	2	0	119	69	no	0.66
157	73	M	92	24	52	6.3	88	100	3	yes	10	2	171	73	yes	1.05
158	64	M	379	26	59	7.2	105	500	3	yes	8	3	105	71	yes	9.05
159	65	F	81	60	78	6.8	171	0	0	no	2	0	134	64	no	0.93
160	59	M	242	29	61	8.4	177	0	3	yes	3	1	122	88	no	0.93
161	75	F	115	38	64	9	233	38.9	3	yes	2	0	122	74	no	0.65
162	50	M	357	32	78	10	337	100	0	no	2	0	128	87	yes	0.74
163	54	M	470	37	74	6.6	114	0	3	yes	2	1	98	65	no	0.72
164	79	F	234	32	46	6	108	0	1	yes	2	0	136	70	no	2.02
165	71	F	74	25	53	7.1	107	30	1	yes	2	0	144	76	no	2.24
166	64	F	360	34	77	8.4	243	150	0	no	2	0	102	59	no	6.78
167	65	M	219	35	65	6.6	126	15.6	0	no	1	0	137	80	yes	1.36
168	66	F	158	38	69	7.8	165	0	3	yes	3	2	126	67	no	0.56
169	79	F	271	26	51	8.3	63	209	3	yes	2	0	168	70	no	2.26
170	77	M	208	34	68	7.6	123	100	3	yes	1	0	159	80	no	1.92
171	61	M	23	50	55	7.6	125	0	1	yes	4	1	130	75	yes	0.99
172	71	M	97	37	106	7.8	115	0	2	yes	4	1	140	80	no	0.91
173	78	M	86	55	43	6.9	141	21.7	2	yes	2	0	149	87	no	1.03
174	64	M	342	27	79	7.4	121	805	3	yes	3	1	121	54	no	2.15
175	56	M	52	61	82	7.5	216	1793	0	no	2	0	112	71	no	2.26
176	58	M	138	31	205	8.6	110	1182	2	yes	1	0	83	55	yes	1.7
177	54	F	433	51	71	10.3	213	6620	1	no	5	0	99	61	no	1.09
178	57	F	263	48	92	10.8	270	100	0	no	3	0	134	74	no	2.24
179	67	M	84	54	130	7.8	142	30	0	no	6	0	144	89	yes	1.25
180	51	F	170	39	71	9.6	265	2	2	yes	2	0	145	75	no	0.89
181	80	M	55	40	62	9.4	179	0	2	yes	2	1	153	80	yes	0.67
182	77	M	139	50	82	8.2	103	0	1	yes	1	0	128	76	no	0.77
183	54	M	131	48	101	6.8	145	0	0	no	2	0	142	100	yes	0.88
184	76	M	121	37	99	9.5	233	0	1	yes	3	1	130	80	yes	0.92
185	70	F	48	53	75	7.7	90	0	0	no	5	0	138	91	no	0.6
186	55	M	194	36	123	8.9	270	100	3	yes	2	4	122	84	no	1.03
187	57	M	109	29	73	6.9	113	0	0	no	2	0	122	84	no	1.25
188	60	F	86	40	99	7	292	0	1	yes	2	1	143	80	no	0.71
189	46	M	191	31	63	6.9	149	0	0	no	2	0	137	88	yes	0.91
190	80	F	318	37	86	7.2	182	3397	1	yes	2	0	160	81	no	1.48
191	63	F	107	55	63	6.8	121	0	0	no	2	0	144	84	no	0.55
192	51	F	107	43	59	6.4	131	3.1	0	no	2	0	123	76	no	0.67
193	78	M	251	26	96	8.3	141	0	0	no	2	0	132	72	no	1.4
194	66	F	158	38	69	7.7	72	0	3	yes	2	1	126	67	no	0.56
195	61	F	547	36	84	7.1	114	0	0	no	2	0	136	83	no	1.21
196	72	M	43	50	115	7.3	213	30	3	yes	12	3	175	115	no	1.46
197	77	M	161	32	55	7.6	123	3692	3	yes	2	0	159	80	no	1.92
198	64	M	89	40	73	9	199	2292	2	yes	4	3	135	98	yes	1.06
199	75	M	117	36	96	6.4	110	100	2	yes	3	0	144	76	no	0.91
200	75	F	73	63	134	6.5	64	2252	3	yes	3	2	140	80	no	3.76
201	58	F	102	37	79	6.7	119	0	0	no	2	0	130	75	no	0.62
202	62	M	148	38	59	7.6	148	0	2	yes	2	0	116	76	yes	0.75
203	47	F	78	46	107	6.5	129	105	1	yes	2	0	123	76	no	0.75
204	73	M	93	46	156	6.4	117	0	0	no	2	0	146	75	no	0.9
205	78	F	87	67	110	6.3	128	0	1	yes	2	0	153	83	no	0.52
206	76	F	126	36	97	6.8	121	100	1	yes	2	0	125	71	no	5.4
207	83	M	104	55	162	8.2	178	44	3	yes	5	3	170	91	no	1.37
208	65	M	79	116	66	6.9	158	4.3	0	no	2	0	168	92	no	0.71
209	69	M	219	44	180	6.9	150	230	0	no	2	0	105	80	yes	1.82
210	48	M	207	38	98	6.5	150	5.55	3	yes	2	0	140	90	yes	0.89
211	48	M	93	37	53	6.8	120	2.43	3	yes	3	1	127	80	yes	0.85
212	74	F	158	41	78	8.2	162	769	0	no	2	0	130	80	no	0.74
213	83	F	108	49	90	8.8	171	0	3	yes	4	2	104	67	no	0.72
214	74	F	149	44	59	8	161	12	3	yes	18	4	148	67	no	1.3
215	62	M	84	29	53	6.4	87	0	2	yes	2	3	121	91	no	8
216	66	M	40	49	64	7.2	145	0	2	yes	2	0	147	80	no	1.03
217	67	F	103	32	71	6.5	110	9.85	0	no	2	0	132	89	no	0.55
218	65	F	104	47	168	6.9	114	15.8	1	no	2	0	152	92	no	0.56
219	61	F	36	48	95	7.7	112	24.6	1	no	6	1	103	60	no	0.33
220	58	M	143	44	52.4	6.4	135	568	1	yes	3	0	113	55	yes	1.39
221	80	F	136	36	64	6.8	133	162	3	yes	3	0	116	53	no	1.16
222	66	F	74	59	113	7.3	116	14.8	3	yes	3	1	130	80	no	0.75
223	62	F	76	59	128	6.4	101	0	0	no	2	0	119	80	no	0.43
224	69	F	71	40	70	7.7	161	5.74	0	no	2	0	140	80	no	0.74
225	65	F	155	40	75	8	207	123	1	yes	2	1	126	70	no	1.37
226	43	F	272	36	91	7.9	89	2134	2	yes	2	1	122	77	no	2.77
227	65	F	239	29	55	6.9	101	1049	3	yes	2	2	121	67	no	2.33
228	62	M	158	43	94	8.1	120	3262	3	yes	2	2	159	78	no	3.04
229	64	M	72	67	67	6.4	125	28.7	2	yes	2	2	103	75	yes	0.91
230	62	M	67	52	60	7.1	97	10.5	0	no	2	0	132	82	no	0.76
231	79	F	118	51	76	7.5	136	345	3	yes	2	1	172	82	no	1.15
232	51	M	134	41	104	6.4	94	6.76	2	yes	4	1	120	80	no	0.98
233	67	M	51	53	73	6.2	153	150	2	yes	2	1	171	76	no	11.4
234	91	F	63	49	100	6.7	149	120	1	yes	6	0	106	44	no	0.67
235	82	M	36	43	31	8.1	176	0	1	yes	2	1	106	60	no	0.95
236	63	F	288	28	75	6.2	113	0	3	yes	2	1	133	74	no	0.68
237	63	M	214	35	90	6.9	140	6.83	2	yes	2	1	120	62	no	0.64
238	87	F	302	31	78	7.2	84	93	2	yes	3	1	135	70	no	1
239	41	M	115	30	133	9.5	121	15.61	3	yes	3	2	146	95	yes	0.78
240	80	M	95	39	97	7.2	154	31.5	3	yes	2	1	98	56	no	1.83
241	63	M	172	35	180	9.8	196	0	2	yes	3	0	125	77	no	6.29
242	63	M	79	55	124	8.1	185	937	1	yes	4	1	151	84	no	1.5
243	61	F	60	49	62	6.2	189	357	0	no	2	0	148	70	no	0.74
244	46	F	129	45	100	8.2	103	0	0	no	2	0	174	104	no	0.6
245	55	F	85	42	59	7.7	127	6.98	0	no	2	0	138	66	no	0.46
246	57	M	68	53	50	6.7	109	3	0	no	2	0	115	82	yes	0.96
247	48	M	755	37	101	7.2	152	139	1	yes	2	0	99	64	yes	1.24
248	84	F	189	43	97	7.5	250	21.4	0	no	2	0	164	94	no	1.04
249	76	M	196	28	62	7.2	134	2.22	2	yes	3	1	134	80	no	1.42
250	58	F	167	30	81	8.4	249	20.4	1	yes	4	0	142	74	no	0.6
251	61	F	157	51	74	6.7	134	4.3	0	no	2	0	120	80	no	0.84
252	79	M	94	40	43	8.3	123	0	2	yes	2	0	142	80	no	0.78
253	69	F	86	37	67	7.4	110	0	0	no	2	0	114	57	no	0.59
254	51	M	827	25	72	7.9	266	0	3	yes	2	0	154	87	yes	0.79
255	78	M	54	40	64	6.4	142	459	1	yes	2	0	131	66	yes	0.97
256	69	F	93	32	56	9.4	158	45	3	yes	6	2	139	71	no	0.66
257	49	M	64	33	98	8	146	6.6	1	yes	2	1	128	82	yes	0.83
258	67	F	72	72	47	8.4	251	0	1	yes	2	0	160	90	no	1.12
259	74	M	74	45	106	6.7	112	30	2	yes	2	2	123	72	no	0.48
260	79	F	204	27	64	6.1	177	32	1	yes	2	0	152	73	no	0.99
261	48	M	96	30	101	7.6	128	2	3	yes	3	1	120	80	yes	0.99
262	73	F	112	35	87	7.6	140	160	0	no	2	0	124	68	no	0.72
263	83	M	54	32	61	7.9	170	60	3	yes	2	1	133	49	no	0.84
264	67	F	134	51	65	7.2	132	29	3	yes	2	1	162	83	no	9.78
265	79	F	192	32	79	6.9	121	5.1	1	no	2	1	130	75	no	0.68
266	71	F	142	40	96	8	134	100	3	yes	3	3	161	80	no	1.12
267	55	F	129	38	170	6.7	98	175	3	yes	2	1	140	80	no	0.74
268	63	M	64	25	92	6.5	76	3740	3	yes	6	1	130	80	no	1.15
269	60	F	134	36	132	6	122	7.6	0	no	2	0	107	66	no	0.55
270	70	F	108	55	100	8.1	73	65	3	yes	11	1	137	58	no	0.99
271	76	F	133	35	103	6.7	220	0	1	yes	2	1	142	64	no	0.84
272	62	F	153	66	102	6.5	135	14	2	yes	2	0	177	94	no	0.95
273	75	F	77	66	150	7	111	100	3	yes	8	0	97	63	no	2.75
274	55	M	174	25	80	8	119	0	3	yes	2	1	140	80	yes	0.88
275	78	M	160	44	160	6.6	115	11	1	yes	2	1	132	84	no	0.93
276	55	M	99	43	73	7.4	209	0	0	no	2	0	157	87	yes	0.87
277	81	F	89	40	70	6.7	89	17	3	yes	6	2	164	84	no	1.01
278	74	M	286	47	121	6.4	119	100	2	yes	1	1	130	77	no	0.93
279	65	M	714	45	54	6.3	123	10.6	1	no	2	1	168	86	yes	1.06
280	63	M	41	33	64	8.6	295	100	1	yes	2	0	157	95	no	6.68
281	88	F	325	38	68	8.7	204	154	1	yes	2	0	157	77	no	0.97
282	61	M	191	28	107	9.8	127	5.1	3	yes	2	0	102	59	yes	0.88
283	55	M	472	36	102	8	147	8.85	3	yes	3	1	114	82	no	1.1
284	64	M	102	36	83	7.5	160	11.4	3	yes	2	1	130	90	no	1.1
285	63	M	200	36	96	8.5	123	0	2	yes	2	0	130	80	yes	0.88
286	69	M	135	39	52	7.2	139	178	3	yes	2	3	120	80	no	0.78
287	68	M	136	41	202	6.6	108	0	3	yes	2	1	145	78	yes	0.86
288	71	M	63	44	93	6.6	116	76	3	yes	2	0	140	65	no	1.07
289	48	M	254	32	164	8.3	281	8.64	1	yes	2	0	127	84	no	0.87
290	62	M	297	29	74	9	109	31	3	yes	2	3	141	96	no	0.95
291	69	M	145	33	88	6.6	112	100	2	yes	2	1	140	90	yes	0.87
292	74	M	101	37	84	6.2	312	300	1	yes	2	0	174	98	yes	4.83
293	64	M	157	39	101	6	162	10	0	no	2	0	124	74	no	0.93
294	64	M	160	52	75	6.9	142	8.2	0	no	2	0	143	86	no	0.89
295	61	M	95	33	82	6.3	101	15.5	1	no	2	1	169	74	no	0.96
296	72	F	142	41	101	7.1	182	0	0	no	2	0	137	80	no	0.84
297	66	M	142	35	142	6.4	122	30	2	yes	2	1	142	104	no	1.1
298	62	M	119	39	83	6.7	147	0	1	no	2	2	143	96	yes	1.07
299	81	M	49	31	71	7.2	147	61	0	no	2	0	128	71	no	0.92
300	60	M	6.5	25	72	6.4	104	36.2	2	yes	2	1	136	78	yes	0.68
301	64	M	103	33	69	6.9	110	0	3	yes	2	2	122	78	no	1.2
302	49	M	116	31	92	6.3	109	0	2	yes	2	1	122	64	yes	1.1
303	61	F	112	38	111	10.7	177	22.7	3	yes	2	2	156	76	no	0.57
304	57	M	128	36	97	6.8	116	0	3	yes	2	0	164	102	no	0.74
305	75	M	118	36	115	7.6	118	77	2	yes	2	1	130	75	no	1.13
306	65	M	207	46	90	6.1	119	20.5	1	yes	2	1	110	75	yes	0.99
307	56	M	200	46	73	7	142	202	3	yes	2	1	135	79	yes	1.35
308	79	F	60	52	65	6.4	150	0	2	yes	2	1	152	85	no	0.77
309	45	M	151	36	174	6.6	105	7	1	yes	2	0	144	84	yes	0.86
310	69	F	96	47	68	6.3	161	0	1	no	2	0	130	75	no	0.49
311	73	F	183	41	130	7	118	25	3	yes	2	2	155	76	no	0.41
312	63	M	157	34	33	7.2	121	0	2	yes	2	1	106	57	yes	1.03
313	56	F	133	56	78	8.3	166	62.3	2	yes	2	1	166	93	no	1.19
314	50	M	78	37	64	6.7	103	57	0	no	2	0	150	86	no	0.87
315	55	M	189	32	118	8.8	136	12.2	2	yes	2	0	140	90	no	1.15
316	59	M	172	48	123	9.8	163	1214	3	yes	2	3	132	62	yes	1.16
317	79	F	86	50	78	8.5	125	0	2	yes	2	1	150	64	no	1.83
318	68	M	228	46	103	6.7	107	50	3	yes	2	1	142	82	yes	1.56
319	83	M	183	51	122	6.7	125	59	1	no	2	0	141	91	yes	1.23
320	82	F	126	27	71	6.9	102	23.6	3	yes	2	2	126	67	no	1.01
321	74	M	173	38	47	7.4	175	0	1	yes	2	0	114	57	no	0.85
322	76	M	72	36	53	6.3	253	98	1	yes	2	0	153	74	yes	1.1
323	54	M	71	36	48	10.5	306	10.5	1	no	1	0	151	90	no	0.87
324	55	M	275	31	48	8.1	104	9.74	2	yes	2	0	124	70	no	1.2
325	73	F	131	45	53	7.2	175	19.9	0	no	2	0	119	71	no	1.2
326	66	M	198	35	54	8.4	126	560	3	yes	3	4	160	92	no	0.88
327	76	F	132	91	85	6.8	129	2010	0	no	2	0	133	77	no	0.97
328	66	M	77	30	61	10.1	121	100	3	yes	5	2	165	52	no	1.1
329	77	F	99	38	52	6.4	120	25.3	1	yes	2	0	118	48	no	0.74
330	54	M	265	43	129	6.6	137	24.7	0	no	1	0	106	77	no	0.79
331	41	M	514	34	98	9.5	156	51	2	yes	3	2	138	94	no	0.56
332	68	F	89	40	53	6	110	4.1	1	yes	3	3	141	101	no	0.79
333	65	F	135	47	106	7.3	132	0	1	yes	2	1	131	80	no	0.69
334	65	M	158	33	102	7.6	113	1.87	2	yes	2	1	128	80	no	2.03
335	65	F	82	34	41	9.5	138	19.1	2	yes	2	1	134	82	no	0.7
336	76	M	105	33	142	7.3	95	7.21	3	yes	4	0	145	75	no	1.79
337	66	F	116	47	91	6.4	136	0	0	no	2	0	122	72	no	0.78
338	52	F	168	38	110	9.2	236	0	1	yes	2	0	128	80	no	4.9
339	74	M	156	31	72	8.3	152	1720	1	yes	2	0	213	95	no	2.8
340	79	M	74	55	110	8.5	223	750	1	yes	2	0	109	56	yes	1.85
341	67	F	84	51	81	6.7	157	104	1	yes	2	0	131	70	no	0.77
342	54	M	162	41	112	6.2	162	11.9	0	no	2	0	163	98	yes	1.86
343	66	M	121	34	136	9	173	0	0	no	2	0	145	82	no	1.11
344	84	M	324	29	57	7.7	115	100	3	yes	2	1	120	80	no	5.75
345	73	F	102	41	57	7.6	120	0	1	yes	2	0	138	73	no	0.85
346	78	F	163	46	169	7.4	200	0	0	no	3	0	136	74	no	0.86
347	81	F	100	31	103	6.5	163	458	0	no	2	0	120	80	no	0.86
348	69	M	77	27	61	8.2	161	53	1	no	4	1	140	80	no	1.27
349	80	F	96	40	58	6.5	64	100	3	yes	2	2	179	85	no	1.29
350	60	M	148	25	87	6.4	105	36.2	2	yes	2	1	136	78	yes	0.68
351	53	M	103	27	171	10.4	139	266	3	yes	3	2	126	85	yes	0.85
352	73	M	248	27	83.4	9.8	112	100	3	yes	3	0	141	70	no	0.98
353	77	F	106	32	123	7.8	110	0	3	yes	3	1	148	87	no	0.74
354	51	M	69	45	73	7.1	134	7.5	1	yes	4	1	128	80	no	0.64
355	79	F	119	37	71	7	143	333	1	yes	2	0	113	70	no	0.74
356	64	M	240	34	97	8.1	101	461	3	yes	2	1	158	73	no	1.38
357	65	F	104	30	85	6.4	111	79	0	no	2	0	119	89	no	0.48
358	63	M	182	37	104	8.2	102	0	3	yes	3	1	132	78	no	0.85
359	83	F	294	33	62.2	7.3	93	4.21	2	yes	4	3	122	56	no	1.04
360	69	F	157	43	113	7.9	130	602	1	yes	2	0	187	88	no	1.75
361	80	F	165	37	93	7.2	166	18.1	1	yes	2	1	171	103	no	0.73
362	84	M	76	60	71	6	102	0	1	yes	2	0	127	71	no	0.91
363	84	M	166	35	121	8	134	10	3	yes	2	1	144	75	no	1.16
364	52	M	726	53	58	9.1	249	4.55	0	no	2	0	13	80	no	1.1
365	75	M	82	30	84	6.7	115	0	2	yes	2	0	130	80	no	0.7
366	73	F	200	32	84	7.6	109	0	2	yes	2	0	113	57	no	0.79
367	74	M	114	45	68	7.3	71	193	2	yes	2	1	140	90	no	6.19
368	57	M	311	38	135	6.5	96	74	3	yes	2	0	144	68	yes	5.13
369	71	F	106	38	95	7.5	169	37.1	0	no	2	0	147	84	no	0.73
370	70	M	111	35	118	6.5	137	11.8	0	no	2	0	164	77	yes	1.04
371	85	F	126	33	87	7.6	116	0	3	yes	9	1	130	89	no	4.79
372	73	M	150	30	43	8.9	84	10	3	yes	2	0	111	61	no	1.12
373	68	M	100	35	115	6.7	97	0	2	yes	2	2	119	76	yes	0.94
374	60	M	634	26	65	7.7	125	9.1	3	yes	2	3	115	77	yes	0.73
375	79	M	113	40	86	7.3	59	300	2	yes	2	0	155	70	no	8.39
376	83	M	137	36	81	6.8	130	0	1	yes	2	0	132	79	no	1.2
377	80	F	87	47	121	8.5	129	0	3	yes	2	1	136	78	no	0.86
378	48	M	125	34	113	6.9	88	697	2	yes	2	3	140	75	no	0.92
379	82	F	157	65	109	6.8	92	51	2	yes	2	2	136	61	no	1.27
380	63	M	103	32	74	6.5	160	5.8	0	no	2	0	150	80	yes	0.75
381	65	F	109	47	88	7.1	154	0	1	yes	2	0	173	72	no	1.25
382	81	F	143	55	104	8.6	86	9.62	2	yes	2	1	104	40	no	1.27
383	72	M	214	38	82.2	7.1	117	10.2	0	no	2	0	120	66	yes	1.15
384	72	F	48	50	50	7.1	154	197	0	no	2	0	108	70	no	0.93
385	60	F	150	35	72	6.4	127	0	0	no	2	0	127	64	no	0.63
386	73	F	52	70	76	7.4	144	2200	0	no	2	0	130	80	no	0.89
387	57	M	124	42	149	7.7	147	9.8	2	yes	2	0	130	74	yes	0.92
388	55	F	305	50	69	7.7	141	0	1	yes	2	0	120	80	no	0.72
389	65	M	176	39	96	6.7	74	0	3	yes	3	3	124	62	yes	1.46
390	72	F	69	52	145	7.5	130	363	1	yes	2	0	156	91	yes	1.02
391	61	F	69	53	76	6.4	130	100	0	no	2	0	170	110	no	1.7
392	77	F	300	50	111	6.4	111	4.42	2	yes	2	0	104	62	no	0.83
393	74	M	108	26	105	6.7	102	0	3	yes	2	2	139	87	no	1.22
394	82	M	64	30	46	8.2	105	99	3	yes	3	1	133	77	no	0.99
395	68	M	138	36	83	6.1	112	0	2	yes	2	1	161	67	yes	0.8
396	63	M	186	34	99.8	9.9	138	500	3	yes	3	1	136	64	yes	1.67
397	63	F	212	45	79	7.4	116	24.1	3	yes	2	1	144	88	no	0.97
398	75	F	98	41	80	6.4	95	24.8	2	yes	3	0	122	68	no	0.67
399	68	M	94	43	115	7.4	118	100	3	yes	2	1	121	72	yes	1
400	61	F	186	50	110	8.6	232	21	0	no	2	0	120	72	no	0.68
401	83	F	129	32	129	7.3	90	925	3	yes	2	1	106	70	no	1.2
402	58	F	254	27	137	7.1	140	10.2	0	no	2	0	164	96	no	0.55
403	78	M	165	36	142	7.2	76	67.1	3	yes	2	0	171	81	yes	1.6
404	86	M	76	60	66	6.4	90	0	3	yes	2	0	145	72	no	2.17
405	75	M	74	33	62	8.4	71	0	3	yes	3	1	157	74	no	2.62
406	60	M	152	34	74	8	109	0	3	yes	3	1	133	88	no	1.18
407	83	M	126	51	140	6.2	83	3428	3	yes	2	1	125	62	no	5.64
408	76	F	96	33	120	6.7	63	151	3	yes	2	1	134	76	no	3.81
409	61	F	59	38	102	7.3	111	10.5	2	yes	2	1	174	84	no	0.52
410	58	M	103	33	103	6.6	87	10	3	yes	2	0	120	80	yes	0.99
411	85	F	126	32	94	6.1	85	145	3	yes	3	0	130	75	no	2
412	65	M	95	40	92	7.4	108	5.7	2	yes	2	1	124	70	no	1
413	66	M	192	27	65	6.8	110	0	3	yes	2	0	136	88	no	1.16
414	89	F	77	37	77	6.5	107	50	3	yes	6	1	130	70	no	1.2
415	73	M	156	39	164	9.5	128	8.2	3	no	2	0	136	78	yes	0.9
416	71	F	86	67	84	8.1	122	0	2	yes	2	1	150	70	no	0.77
417	58	F	79	37	90	9.9	62	50	3	yes	3	1	160	80	no	0.76
418	81	F	262	15	86	6.7	97	15.4	2	yes	2	1	149	71	no	0.6
419	53	M	109	44	120	7.8	127	596	3	yes	3	1	112	78	no	1.4
420	60	M	115	39	130	9.4	114	10	3	yes	2	3	158	80	yes	1.4
421	48	M	60	27	105	6.5	88	10	3	yes	3	2	141	82	yes	0.85
422	75	M	66	40	63	6.6	94	500	3	yes	3	3	147	80	no	6.05
423	73	F	92	48	111	7.9	78	1452	3	yes	4	1	120	80	no	3.15
